# Supplementary material
Source: PubMed Central journal article supplement (PMC4580340)
Supplement: NIHMS721263-supplement-Title_page.pdf [file NIHMS721263-supplement-Title_page.pdf]

Original Article

Title: A mapping between interactions and interference: implications for vaccine trials

Author: Tyler J. VanderWeele  
Departments of Epidemiology and Biostatistics, Harvard School of Public Health

Author: Jan P. Vandenbroucke  
Department of Clinical Epidemiology, Leiden University Medical Center

Author: Eric J. Tchetgen Tchetgen  
Departments of Epidemiology and Biostatistics, Harvard School of Public Health

Author: James M. Robins  
Departments of Epidemiology and Biostatistics, Harvard School of Public Health

Corresponding Author:  
Tyler J. VanderWeele  
Harvard School of Public Health  
Departments of Epidemiology and Biostatistics  
677 Huntington Avenue  
Boston MA 02115  
Phone: 617-432-7855  
Fax: 617-432-1884  
E-mail: tvanderw@hsph.harvard.edu

Abbreviated running head: Interactions and interference

Word Count (abstract): 172  
Word Count (text): 4493

Total number of pages: 25  
Pages of text: 24  
Pages of tables: 1  
Pages of figures: 0

Financial support: National Institutes of Health grants ES017876 and HD060696.
